# Supplementary material for: β-Isocyanoalanine as an IR probe: comparison of vibrational dynamics between isonitrile and nitrile-derivatized IR probes
Source: Royal Society of Chemistry journal article supplement (doi:10.1039/c5cp00454c), 2015-01-01
Supplement: c5cp00454c1.pdf [file c5cp00454c1.pdf]

## Supporting Information

### **$\beta$ -Isocyanoalanine as an IR probe: comparison of vibrational dynamics between isonitrile and nitrile-derivatized IR probes**

Michał Maj,<sup>‡ab</sup> Changwoo Ahn,<sup>‡b</sup> Dorota Kossowska,<sup>ab</sup> Kwanghee Park,<sup>ab</sup>  
Kyungwon Kwak,<sup>c</sup> Hogyu Han<sup>\*b</sup> and Minhaeng Cho<sup>\*ab</sup>

<sup>a</sup> *Center for Molecular Spectroscopy and Dynamics, Institute for Basic Science  
(IBS), Seoul 136-701, Korea*

<sup>b</sup> *Department of Chemistry, Korea University, Seoul 136-701, Korea*

<sup>c</sup> *Department of Chemistry, Chung-Ang University, Seoul 156-756, Korea*

## S1. Syntheses of compounds

**General.**  $^1\text{H}$  and  $^{13}\text{C}$  spectra were recorded on a Varian Unity Inova 500 NMR spectrometer. Chemical shifts ( $\delta$ ) and coupling constants ( $J$ ) are reported in parts per million (ppm) and hertz (Hz), respectively.  $^1\text{H}$  NMR spectra are referenced to TMS (tetramethylsilane in  $\text{CDCl}_3$  and  $\text{DMSO-}d_6$ ) as an internal standard.  $^{13}\text{C}$  NMR spectra are referenced to solvent ( $^{13}\text{C}$ :  $\text{CDCl}_3$ ,  $\delta$  77.00 ppm;  $\text{DMSO-}d_6$ ,  $\delta$  39.50 ppm) as an internal standard. High-resolution mass spectra (HRMS) were recorded on a JEOL JMS-700 mass spectrometer using a chemical ionization (CI) technique. Thin-layer chromatography (TLC) was performed on silica gel 60 F<sub>254</sub> precoated plates (0.25 mm thickness, Merck, Darmstadt). Flash chromatography was carried out on silica gel 60 (230–400 mesh, Merck). Reagent-grade chemicals were purchased from Aldrich and TCI and used as received unless otherwise specified. Compounds **0** (Ac-L-Ala-NHMe)<sup>S1</sup> and **3** (Ac-L-Ala(N<sub>3</sub>)-NHMe)<sup>S2</sup> were prepared as reported previously.

**Ac-L-Dap(Boc)-OMe (5).**<sup>S2</sup> To a suspension of **4-HCl** (H-Dap(Boc)-OMe·HCl, 3.00 g, 11.8 mmol, Bachem, Bubendorf) in  $\text{CH}_2\text{Cl}_2$  (50 mL) were added triethylamine (5.0 mL, 35.9 mmol) and acetic anhydride (5.5 mL, 58.3 mmol). After stirring at room temperature for 3 h, the reaction mixture was quenched with  $\text{H}_2\text{O}$  (100 mL) and extracted with  $\text{CH}_2\text{Cl}_2$  (100 mL  $\times$  2). The combined organic layers were washed with brine (100 mL  $\times$  1), dried over  $\text{MgSO}_4$  and concentrated *in vacuo*. The residue was purified by flash chromatography ( $\text{MeOH}/\text{CH}_2\text{Cl}_2$  = 1:100–1:10) to give **5** (2.98 g, 97%) as a colorless oil. TLC ( $\text{MeOH}/\text{CH}_2\text{Cl}_2$  = 1:20)  $R_f$  = 0.34;  $^1\text{H}$  NMR (500 MHz,  $\text{CDCl}_3$ )  $\delta$  6.73 (d,  $J$  = 4.0 Hz, 1H), 4.98 (t,  $J$  = 6.0 Hz, 1H), 4.60 (td,  $J$  = 6.0, 4.5 Hz, 1H), 3.76 (s, 3H), 3.56 (dt,  $J$  = 14.5, 7.1 Hz, 1H), 3.51 (dt,  $J$  = 14.5, 5.2 Hz, 1H), 2.04 (s, 3H), 1.44 (s, 9H);  $^{13}\text{C}$  NMR (125 MHz,  $\text{CDCl}_3$ )  $\delta$  170.91, 170.32, 156.65, 80.07, 53.71, 52.67, 42.10, 28.23, 23.05; HRMS (CI+) for  $\text{C}_{11}\text{H}_{21}\text{N}_2\text{O}_5$  ( $M\text{H}^+$ ), calcd 261.1450, found 261.1453.

**Ac-L-Dap-OMe (6).**<sup>S2</sup> To **5** (2.87 g, 11.0 mmol) was added trifluoroacetic acid (TFA, 15 mL). After stirring at room temperature for 1 h, the reaction mixture was concentrated *in vacuo*. The residue was purified by flash chromatography ( $\text{MeOH}/\text{CH}_2\text{Cl}_2$  = 1:100–1:5) to give **6-TFA** (2.83 g, 94%) as a colorless oil. TLC ( $\text{MeOH}/\text{CH}_2\text{Cl}_2$  = 1:7 on a plate pretreated with triethylamine)  $R_f$  = 0.40;  $^1\text{H}$  NMR (500 MHz,  $\text{DMSO-}d_6$ )  $\delta$  8.52 (d,  $J$  = 8.5 Hz, 1H), 8.12 (brs, 2H), 4.55 (td,  $J$  = 8.5, 4.8 Hz, 1H), 3.66 (s, 3H), 3.23 (dd,  $J$  = 13.0, 5.0 Hz, 1H),

3.06 (dd,  $J = 13.3, 9.3$  Hz, 1H), 1.89 (s, 3H);  $^{13}\text{C}$  NMR (125 MHz,  $\text{DMSO-}d_6$ )  $\delta$  170.16, 169.69, 52.43, 49.93, 39.26, 22.48; HRMS (CI+) for  $\text{C}_6\text{H}_{13}\text{N}_2\text{O}_3$  ( $\text{MH}^+$ ), calcd 161.0926, found 161.0929.

**Ac-L-Dap(CHO)-OMe (7).**<sup>S3</sup> To a suspension of **6**-TFA (2.0 g, 7.29 mmol) in THF (100 mL) were added sodium formate (520 mg, 7.65 mmol) and 2,2,2-trifluoroethyl formate (TFEF, 2.13 mL, 21.9 mmol). After stirring at room temperature for 48 h, the reaction mixture was concentrated *in vacuo*. The residue was purified by flash chromatography ( $\text{MeOH}/\text{CH}_2\text{Cl}_2 = 1:100\text{--}1:10$ ) to give **7** (1.08 g, 79%) as a colorless oil. TLC ( $\text{MeOH}/\text{CH}_2\text{Cl}_2 = 1:10$ )  $R_f = 0.42$ ;  $^1\text{H}$  NMR (500 MHz,  $\text{CDCl}_3$ ) two rotamers at 25 °C (4.8:1), major rotamer  $\delta$  8.19 (d,  $J = 1.0$  Hz, 1H), 6.83 (d,  $J = 7.0$  Hz, 1H), 6.57 (t,  $J = 5.5$  Hz, 1H), 4.66 (dt,  $J = 7.0, 5.5$  Hz, 1H), 3.78 (s, 3H), 3.70 (t,  $J = 6.0$  Hz, 2H), 2.05 (s, 3H), minor rotamer  $\delta$  7.93 (d,  $J = 11.0$  Hz, 1H), 7.06 (d,  $J = 7.5$  Hz, 1H), 6.87 (dt,  $J = 11.8, 5.8$  Hz, 1H), 4.75 (dt,  $J = 7.3, 3.8$  Hz, 1H), 3.82 (s, 3H), 3.69 (dt,  $J = 13.3, 3.8$  Hz, 1H), 3.64 (dt,  $J = 13.3, 4.6$  Hz, 1H), 2.08 (s, 3H);  $^{13}\text{C}$  NMR (125 MHz,  $\text{CDCl}_3$ ) major rotamer  $\delta$  170.85, 170.58, 162.21, 52.96, 52.87, 40.18, 23.01, minor rotamer  $\delta$  170.55, 170.40, 165.36, 53.07, 53.03, 43.39, 22.84; HRMS (CI+) for  $\text{C}_7\text{H}_{13}\text{N}_2\text{O}_4$  ( $\text{MH}^+$ ), calcd 189.0875, found 189.0873.

**Ac-L-Ala(NC)-OMe (8).**<sup>S4</sup> To a solution of **7** (973 mg, 5.17 mmol) in dry  $\text{CH}_2\text{Cl}_2$  (50 mL) was added triethylamine (3.6 mL, 25.8 mmol) under Ar. The resulting mixture was cooled to  $-30$  °C and a solution of phosphorus(V) oxychloride (0.72 mL, 7.72 mmol) in dry  $\text{CH}_2\text{Cl}_2$  (10 mL) was added dropwise over 30 min with stirring. After stirring at  $-30$  °C for 2 h, the reaction mixture was quenched with cold saturated aqueous  $\text{NaHCO}_3$  (100 mL), warmed to room temperature and extracted with  $\text{CH}_2\text{Cl}_2$  (100 mL  $\times$  2). The combined organic layers were washed with brine (100 mL  $\times$  1), dried over  $\text{Na}_2\text{SO}_4$  and concentrated *in vacuo*. The residue was purified by flash chromatography ( $\text{MeOH}/\text{CH}_2\text{Cl}_2 = 1:100\text{--}1:50$ ) to give **8** (448 mg, 51%) as a white solid. TLC ( $\text{MeOH}/\text{CH}_2\text{Cl}_2 = 1:20$ )  $R_f = 0.39$ ;  $^1\text{H}$  NMR (500 MHz,  $\text{CDCl}_3$ )  $\delta$  6.57 (d,  $J = 4.5$  Hz, 1H), 4.75 (dt,  $J = 6.0, 3.0$  Hz, 1H), 3.94 (dd,  $J = 15.3, 3.8$  Hz, 1H), 3.89 (dd,  $J = 15.5, 3.5$  Hz, 1H), 3.87 (s, 3H), 2.11 (s, 3H);  $^{13}\text{C}$  NMR (125 MHz,  $\text{CDCl}_3$ )  $\delta$  170.17, 168.67, 159.53 (t,  $J = 3.8$  Hz), 53.42, 51.49, 43.52 (t,  $J = 6.2$  Hz), 22.94; HRMS (CI+) for  $\text{C}_7\text{H}_{11}\text{N}_2\text{O}_3$  ( $\text{MH}^+$ ), calcd 171.0770, found 171.0768.

**Ac-L-Ala(NC)-NHMe (1).**<sup>S5</sup> To **8** (301 mg, 1.77 mmol) was added methylamine solution (40% in MeOH, 2.8 mL, 36.1 mmol). After stirring at room temperature for 4 h, the reaction

mixture was concentrated *in vacuo*. The residue was purified by flash chromatography (MeOH/CH<sub>2</sub>Cl<sub>2</sub> = 1:100–1:10) to give **1** (213 mg, 71%) as a white solid. TLC (MeOH/CH<sub>2</sub>Cl<sub>2</sub> = 1:10) *R*<sub>f</sub> = 0.48; <sup>1</sup>H NMR (500 MHz, DMSO-*d*<sub>6</sub>) δ 8.36 (d, *J* = 8.5 Hz, 1H), 8.08 (q, *J* = 4.5 Hz, 1H), 4.54 (td, *J* = 7.7, 5.8 Hz, 1H), 3.75 (dd, *J* = 14.8, 5.3 Hz, 1H), 3.65 (dd, *J* = 15.0, 7.5 Hz, 1H), 2.61 (d, *J* = 4.5 Hz, 3H), 1.90 (s, 3H); <sup>13</sup>C NMR (125 MHz, DMSO-*d*<sub>6</sub>) δ 169.68, 168.21, 157.44 (t, *J* = 3.9 Hz), 51.38, 42.84 (t, *J* = 5.8 Hz), 25.69, 22.50; HRMS (CI<sup>+</sup>) for C<sub>7</sub>H<sub>12</sub>N<sub>3</sub>O<sub>2</sub> (*MH*<sup>+</sup>), calcd 170.0930, found 170.0928.

**Boc-L-Ala(CN)-OMe (10).**<sup>S6</sup> To a solution of **9** (Boc-β-cyano-Ala-OH, 3.00 g, 14.0 mmol, Bachem, Bubendorf) in DMF (20 mL) was added potassium carbonate (1.93 g, 14.0 mmol) and then slowly iodomethane (3.5 mL, 56.2 mmol) at 0 °C. After stirring at room temperature for 12 h, the reaction mixture was quenched with H<sub>2</sub>O (200 mL) and extracted with EtOAc (200 mL × 2). The combined organic layers were washed with saturated aqueous NaHCO<sub>3</sub> (200 mL × 1) and brine (200 mL × 1), dried over MgSO<sub>4</sub> and concentrated *in vacuo*. The residue was purified by flash chromatography (EtOAc/*n*-hexane = 1:5–1:2) to give **10** (2.68 g, 84%) as a white solid. TLC (EtOAc/*n*-hexane = 1:2) *R*<sub>f</sub> = 0.46; <sup>1</sup>H NMR (500 MHz, CDCl<sub>3</sub>) δ 5.47 (d, *J* = 5.0 Hz, 1H), 4.53 (dt, *J* = 6.0, 5.0 Hz, 1H), 3.85 (s, 3H), 3.01 (dd, *J* = 17.0, 5.0 Hz, 1H), 2.93 (dd, *J* = 17.0, 4.5 Hz, 1H), 1.46 (s, 9H); <sup>13</sup>C NMR (125 MHz, CDCl<sub>3</sub>) δ 169.36, 154.77, 116.12, 81.02, 53.34, 50.26, 28.19, 21.87; HRMS (CI<sup>+</sup>) for C<sub>10</sub>H<sub>17</sub>N<sub>2</sub>O<sub>4</sub> (*MH*<sup>+</sup>), calcd 229.1188, found 229.1192.

**H-L-Ala(CN)-OMe (11).**<sup>S7</sup> To **10** (2.50 g, 11.0 mmol) was added hydrogen chloride solution (4.0 M in 1,4-dioxane, 30 mL, 120 mmol). After stirring at room temperature for 1 h, the reaction mixture was concentrated *in vacuo*. The residue was purified by flash chromatography (MeOH/CH<sub>2</sub>Cl<sub>2</sub> = 1:100–1:10) to give **11-HCl** (1.66 g, 92%) as a colorless oil. TLC (MeOH/CH<sub>2</sub>Cl<sub>2</sub> = 1:20) *R*<sub>f</sub> = 0.52; <sup>1</sup>H NMR (500 MHz, CDCl<sub>3</sub>) δ 3.81 (dd, *J* = 7.0, 5.5 Hz, 1H), 3.80 (s, 3H), 2.81 (dd, *J* = 16.8, 4.8 Hz, 1H), 2.72 (dd, *J* = 17.0, 7.0 Hz, 1H), 1.81 (brs, 2H); <sup>13</sup>C NMR (125 MHz, CDCl<sub>3</sub>) δ 172.50, 116.82, 52.84, 51.17, 23.79; HRMS (CI<sup>+</sup>) for C<sub>5</sub>H<sub>9</sub>N<sub>2</sub>O<sub>2</sub> (*MH*<sup>+</sup>), calcd 129.0664, found 129.0662.

**Ac-L-Ala(CN)-OMe (12).**<sup>S2</sup> To a suspension of **11-HCl** (1.29 g, 7.84 mmol) in CH<sub>2</sub>Cl<sub>2</sub> (50 mL) were added triethylamine (3.3 mL, 23.7 mmol) and acetic anhydride (3.7 mL, 39.2 mmol). After stirring at room temperature for 2 h, the reaction mixture was quenched with H<sub>2</sub>O (100 mL) and extracted with CH<sub>2</sub>Cl<sub>2</sub> (100 mL × 2). The combined organic layers were

washed with brine (100 mL  $\times$  1), dried over  $\text{MgSO}_4$  and concentrated *in vacuo*. The residue was purified by flash chromatography ( $\text{MeOH}/\text{CH}_2\text{Cl}_2 = 1:100\text{--}1:20$ ) to give **12** (626 mg, 47%) as a white solid. TLC ( $\text{MeOH}/\text{CH}_2\text{Cl}_2 = 1:20$ )  $R_f = 0.52$ ;  $^1\text{H}$  NMR (500 MHz,  $\text{CDCl}_3$ )  $\delta$  6.66 (d,  $J = 5.5$  Hz, 1H), 4.77 (dt,  $J = 6.8, 5.1$  Hz, 1H), 3.86 (s, 3H), 3.08 (dd,  $J = 17.0, 5.5$  Hz, 1H), 2.96 (dd,  $J = 16.8, 4.8$  Hz, 1H), 2.09 (s, 3H);  $^{13}\text{C}$  NMR (125 MHz,  $\text{CDCl}_3$ )  $\delta$  170.27, 169.28, 116.12, 53.43, 49.00, 22.88, 21.26; HRMS (CI+) for  $\text{C}_7\text{H}_{11}\text{N}_2\text{O}_3$  ( $\text{MH}^+$ ), calcd 171.0770, found 171.0769.

**Ac-L-Ala(CN)-NHMe (2).**<sup>S5</sup> To **12** (379 mg, 2.23 mmol) was added methylamine solution (40% in MeOH, 3.5 mL, 45.1 mmol). After stirring at room temperature for 1 h, the reaction mixture was concentrated *in vacuo*. The residue was purified by flash chromatography ( $\text{MeOH}/\text{CH}_2\text{Cl}_2 = 1:100\text{--}1:10$ ) to give **2** (329 mg, 87%) as a white solid. TLC ( $\text{MeOH}/\text{CH}_2\text{Cl}_2 = 1:20$ )  $R_f = 0.28$ ;  $^1\text{H}$  NMR (500 MHz,  $\text{CDCl}_3$ )  $\delta$  6.87 (d,  $J = 8.5$  Hz, 1H), 6.85 (brs, 1H), 4.84 (dt,  $J = 8.0, 6.5$  Hz, 1H), 2.91 (dd,  $J = 17.0, 6.5$  Hz, 1H), 2.85 (d,  $J = 5.0$  Hz, 3H), 2.81 (dd,  $J = 17.0, 6.5$  Hz, 1H), 2.08 (s, 3H);  $^{13}\text{C}$  NMR (125 MHz,  $\text{CDCl}_3$ )  $\delta$  170.77, 168.94, 116.81, 49.24, 26.48, 23.02, 21.12; HRMS (CI+) for  $\text{C}_7\text{H}_{12}\text{N}_3\text{O}_2$  ( $\text{MH}^+$ ), calcd 170.0930, found 170.0930.

## S2. Wobbling-in-a-cone model<sup>S8,S9</sup>

To extract detailed information on restricted orientational motion from biexponential anisotropy decay, the experimentally measured orientational relaxation lifetimes are analysed by a wobbling-in-a-cone model. The long time component is associated with full orientational randomization, whereas the short time component results from restricted wobbling motion, with the transition dipoles undergoing orientational diffusion within a cone of semiangle  $\theta_c$ . The anisotropy decay within the wobbling-in-a-cone model is given as

$$r(t) = 0.4 \left[ Q^2 + (1 - Q^2) \exp(-t / \tau_w) \right] \exp(-t / \tau_1) \quad (\text{S1})$$

where  $Q^2$  ( $0 \leq Q^2 \leq 1$ ) is the generalized order parameter describing the degree of restriction on the orientational diffusion, and  $\tau_w$  and  $\tau_1$  are time constant for the restricted (fast) and complete relaxation, respectively. The  $\tau_w$  time constant is determined from the experimentally measured orientational relaxation lifetimes as

$$\tau_w = \left( \tau_{\text{or}2}^{-1} - \tau_{\text{or}1}^{-1} \right)^{-1} \quad (\text{S2})$$

Note that for  $Q^2 = 1$ , the equation simplifies to a single exponential decay with long time component  $\tau_1$ , whereas for  $Q^2 = 0$  the orientational motion is fully restricted, and complete randomization occurs mostly due to the wobbling motion since  $\tau_1 > \tau_w$ . The parameter  $Q^2$  is related to the cone semiangle by the following formula:

$$Q^2 = \left[ 0.5 \cos \theta_c (1 + \cos \theta_c) \right]^2 \quad (\text{S3})$$

The wobbling-in-a-cone diffusion constant can be then calculated by

$$D_w = \frac{x_w^2 (1 + x_w)^2 \left\{ \ln \left[ (1 + x_w) / 2 \right] + (1 - x_w) / 2 \right\}}{\tau_w (1 - Q^2) [2(x_w - 1)]} + \frac{(1 - x_w)(6 + 8x_w - x_w^2 - 12x_w^3 - 7x_w^4)}{24\tau_w (1 - Q^2)} \quad (\text{S4})$$

where  $x_w = \cos \theta_c$ . The diffusion constant of slow, complete orientational randomization can be calculated by

$$D_1 = \frac{1}{6\tau_{\text{or}1}} \quad (\text{S5})$$

**Table S1** Vibrational properties of the NC stretching mode of **1** in various solvents<sup>a</sup>

| Solvent                            | $\omega_1$ (cm <sup>-1</sup> ) | FWHM <sup>b</sup> (cm <sup>-1</sup> ) | $\omega_2$ (cm <sup>-1</sup> ) | FWHM <sup>b</sup> (cm <sup>-1</sup> ) |
|------------------------------------|--------------------------------|---------------------------------------|--------------------------------|---------------------------------------|
| DMF                                | 2148.4                         | 10.7                                  | —                              | —                                     |
| THF                                | 2148.7                         | 9.6                                   | —                              | —                                     |
| MeOH                               | 2150.2                         | 10.3                                  | 2172.7                         | 18.5                                  |
| MeOAc                              | 2151.0                         | 10.0                                  | —                              | —                                     |
| CHCl <sub>3</sub>                  | —                              | —                                     | 2154.0                         | 17.4                                  |
| D <sub>2</sub> O                   | —                              | —                                     | 2169.5                         | 24.1                                  |
| CF <sub>3</sub> CH <sub>2</sub> OH | 2152.6                         | 14.6                                  | 2183.8                         | 22.0                                  |

<sup>a</sup> Fitting parameters obtained from Fig. 2. <sup>b</sup> Full width at half-maximum**Table S2** Amide I band properties of **0–3** in D<sub>2</sub>O<sup>a</sup>

|                                              | <b>0</b> | <b>1</b> | <b>2</b> | <b>3</b> |
|----------------------------------------------|----------|----------|----------|----------|
| $\omega_{\text{center}}$ (cm <sup>-1</sup> ) | 1635.8   | 1650.0   | 1651.3   | 1642.7   |
| FWHM <sup>b</sup> (cm <sup>-1</sup> )        | 37.7     | 39.2     | 42.5     | 39.7     |

<sup>a</sup> Fitting parameter obtained from Fig. 3a. <sup>b</sup> Full width at half-maximum.**Table S3** Wobbling-in-a-cone model analysis results for the biexponential anisotropy decay of **1** in D<sub>2</sub>O<sup>a</sup>

| $Q$  | $\theta_c$ (°) | $\tau_w$ (ps) | $\tau_1$ (ps) | $D_w^{-1}$ (ps) | $D_1^{-1}$ (ps) |
|------|----------------|---------------|---------------|-----------------|-----------------|
| 0.53 | 36.5           | 0.55          | 10.3          | 5.3             | 61.8            |

<sup>a</sup> See eqn (S1)–(S5) in Section S1 of the ESI.†

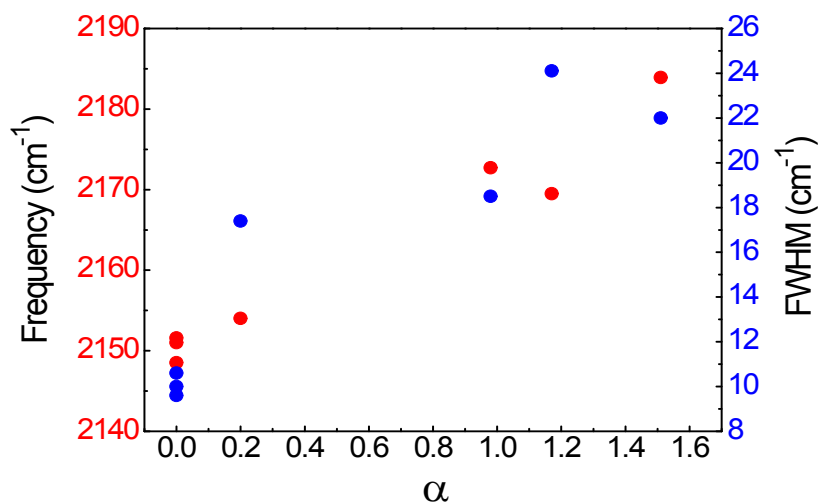

**Fig. S1** Kamlet-Taft plot for **1**. The frequency and full width at half-maximum (FWHM) of the NC stretching mode are plotted against the Kamlet-Taft solvent parameter  $\alpha^{\text{S10}}$  for H-bond donor strength.

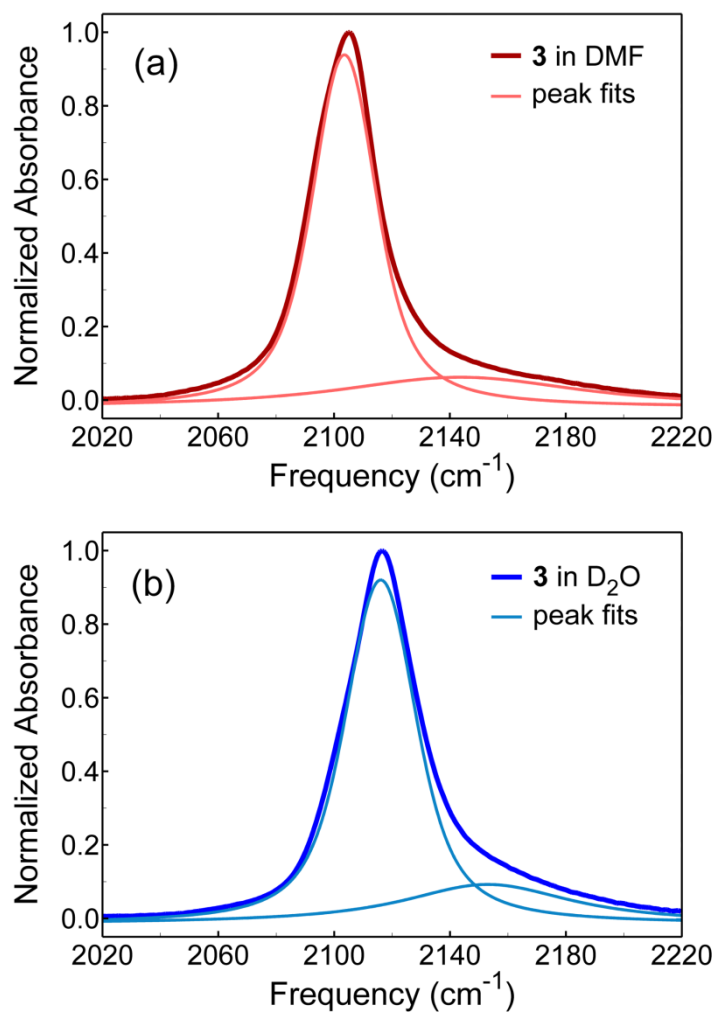

**Fig. S2** Factor analyses of the azido ( $N_3$ ) FTIR spectra of **3** in DMF (a) and  $D_2O$  (b). The azido FTIR spectra, which are taken from Fig. 3d, can be fitted to two Voigt functions. Asymmetry in the high frequency region is observed regardless of the solvent used.

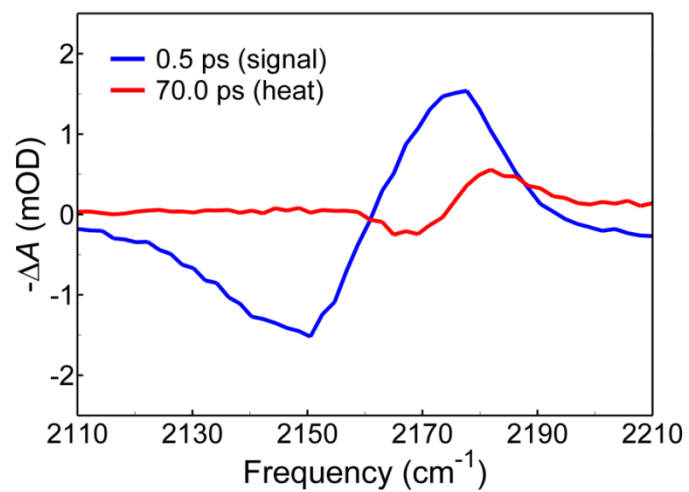

**Fig. S3** Isotropic IR pump-probe spectra of **1** in D<sub>2</sub>O at short (0.5 ps) and long (70 ps) delay times.

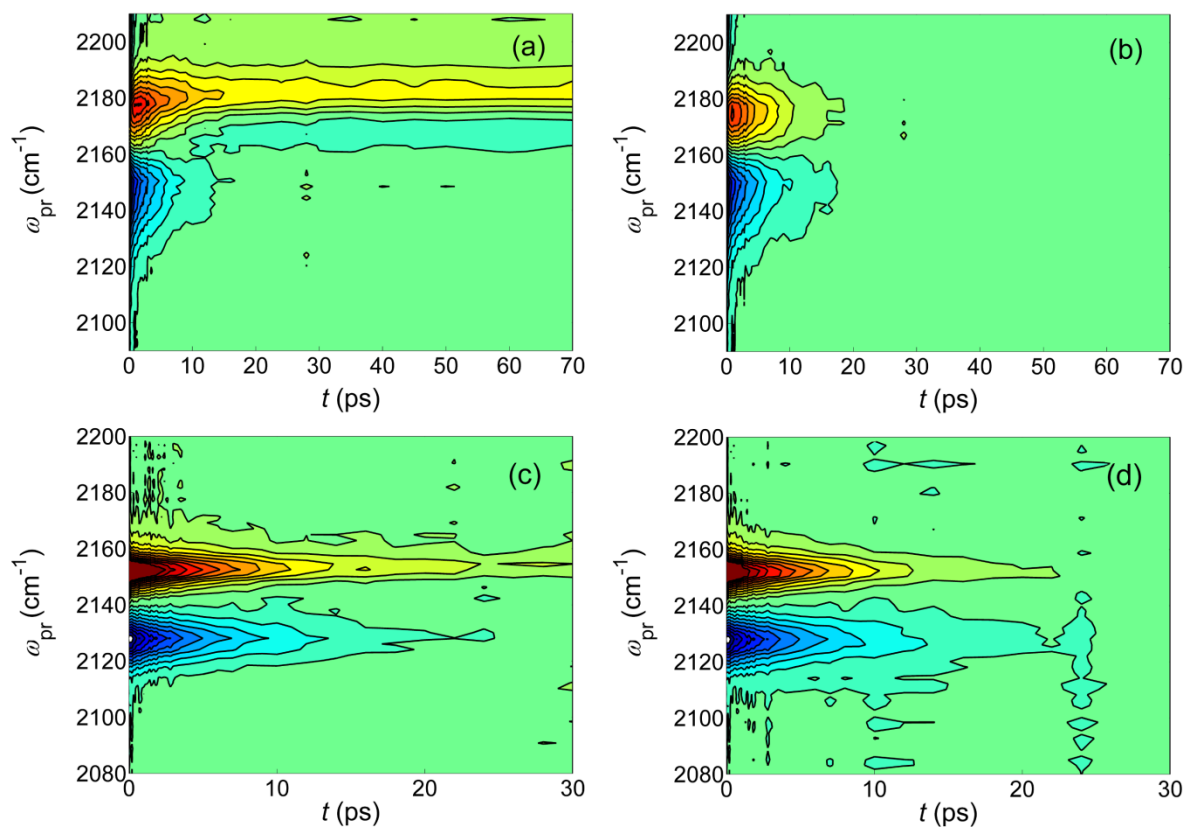

**Fig. S4** Time- and frequency-resolved isotropic IR pump-probe signals at the delay time  $t$  for **1** in D<sub>2</sub>O (upper) and DMF (lower) before (left) and after (right) subtraction of the heat contribution. Fig. S4b and d were used to obtain Fig. 5.

## References

- S1 K.-K. Lee, K.-I. Oh, H. Lee, C. Joo, H. Han and M. Cho, *ChemPhysChem.*, 2007, **8**, 2218–2226.
- S2 K.-I. Oh, J.-H. Lee, C. Joo, H. Han and M. Cho, *J. Phys. Chem. B*, 2008, **112**, 10352–10357.
- S3 D. R. Hill., C.-N. Hsiao, R. Kurukulasuriya and S. J. Wittenberger, *Org. Lett.*, 2002, **4**, 111–113.
- S4 G. Zhao, C. Bughin, H. Bienaymé and J. Zhu, *Synlett*, 2003, 1153–1154.
- S5 G. A. Reichard, C. Stengone, S. Paliwal, I. Mergelsberg, S. Majmundar, C. Wang, R. Tiberi, A. T. McPhail, J. J. Piwinski and N.-Y. Shih, *Org. Lett.*, 2003, **5**, 4249–4251.
- S6 D. Kand, D. P. Chauhan, M. Lahiri and P. Talukdar, *Chem. Commun.*, 2013, **49**, 3591–3593.
- S7 A. J. Pearson and D. V. Ciurea, *J. Org. Chem.*, 2008, **73**, 760–763.
- S8 S. Park, D. E. Moilanen and M. D. Fayer, *J. Phys. Chem. B*, 2008, **112**, 5279–5290.
- S9 G. Lipari and A. Szabo, *Biophys. J.*, 1980, **30**, 489–506.
- S10 M. J. Kamlet, J.-L. M. Abboud, M. H. Abraham and R. W. Taft, *J. Org. Chem.*, 1983, **48**, 2877–2887.
